# Supplementary material for: Metabolomic Insights of the Effects of Bacterial Algicide IRI-160AA on Dinoflagellate Karlodinium veneficum
Source: MDPI journal article supplement (doi:10.3390/metabo12040317), 2022-04-01
Supplement: s1 [file s1]

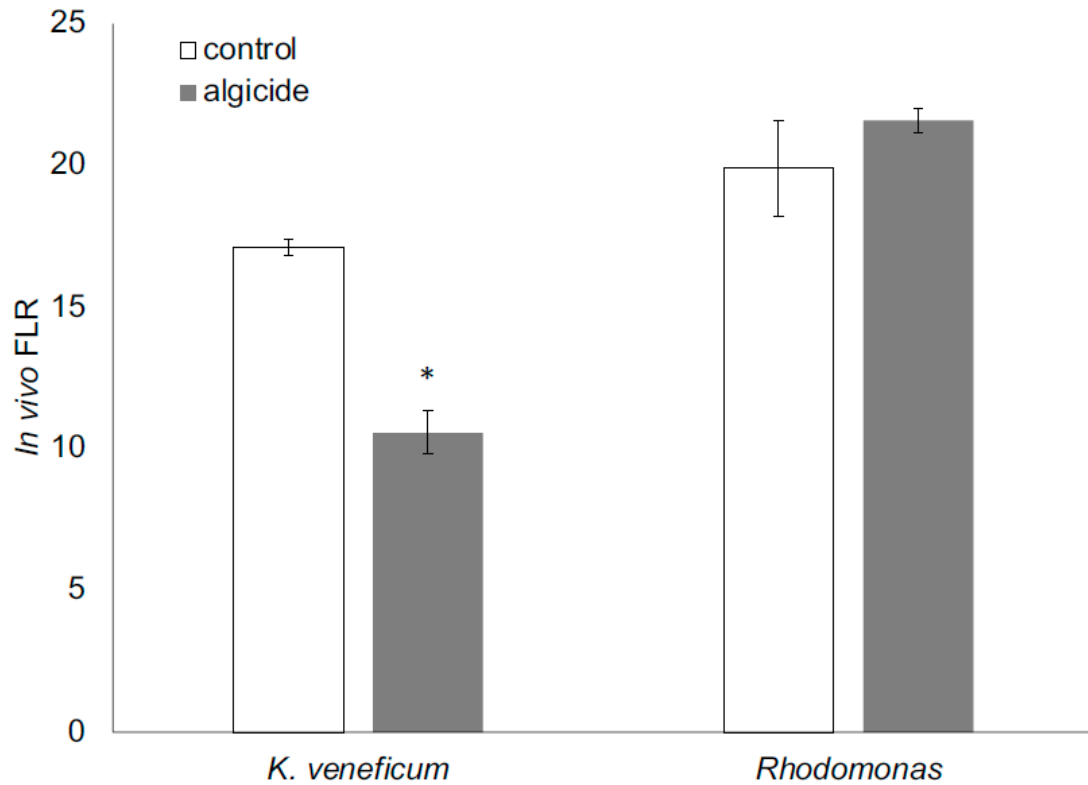

**Supplementary Figure S1.** In vivo fluorescence (FLR) of the harmful dinoflagellate *Karlodinium veneficum* and the control cryptophyte *Rhodomonas* treated with f/2 medium without the algicide (control) or the algicide for 19 h. Error bars represent standard deviations of 3 replicates. “\*” indicates significant differences between the control and the treatment ( $p < 0.05$ ).

#### A. *Karlodinium veneficum*

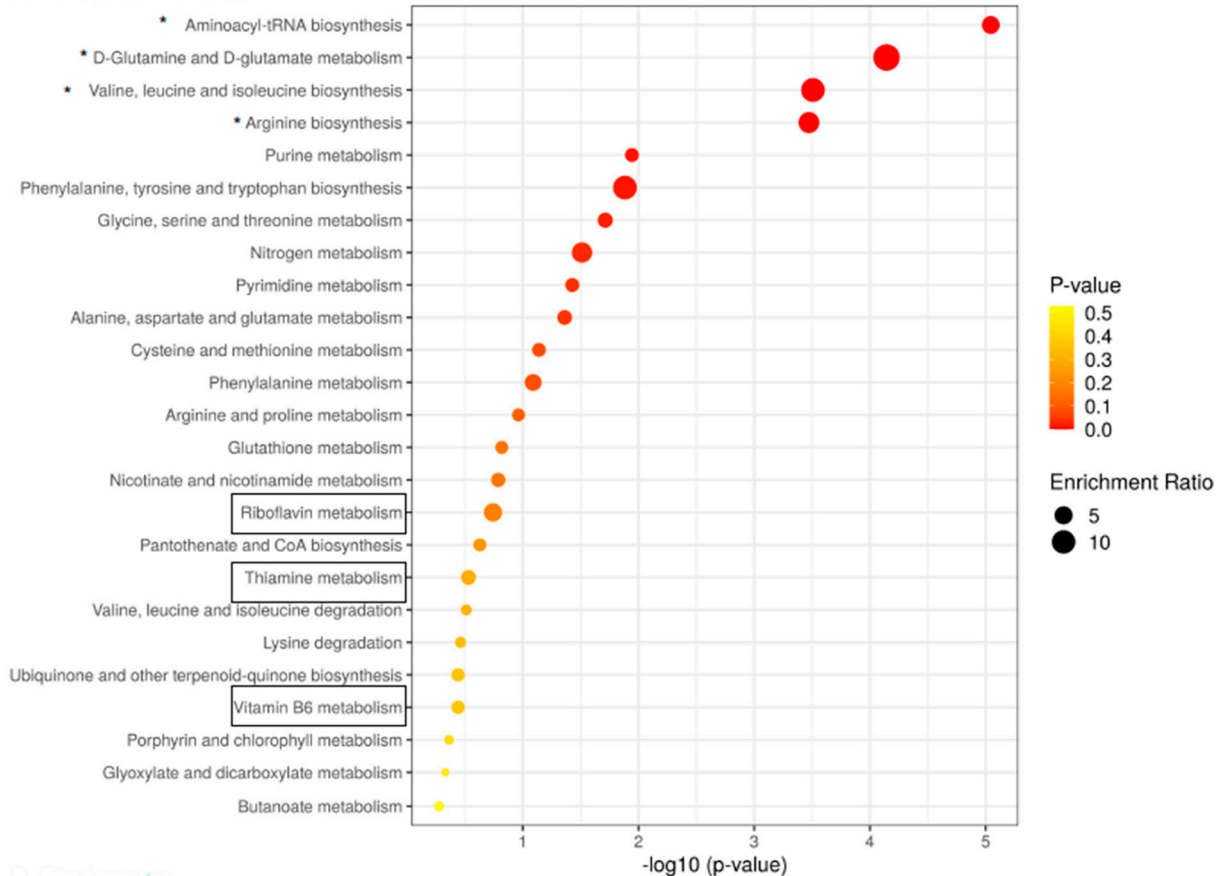

## B. *Rhodomonas*

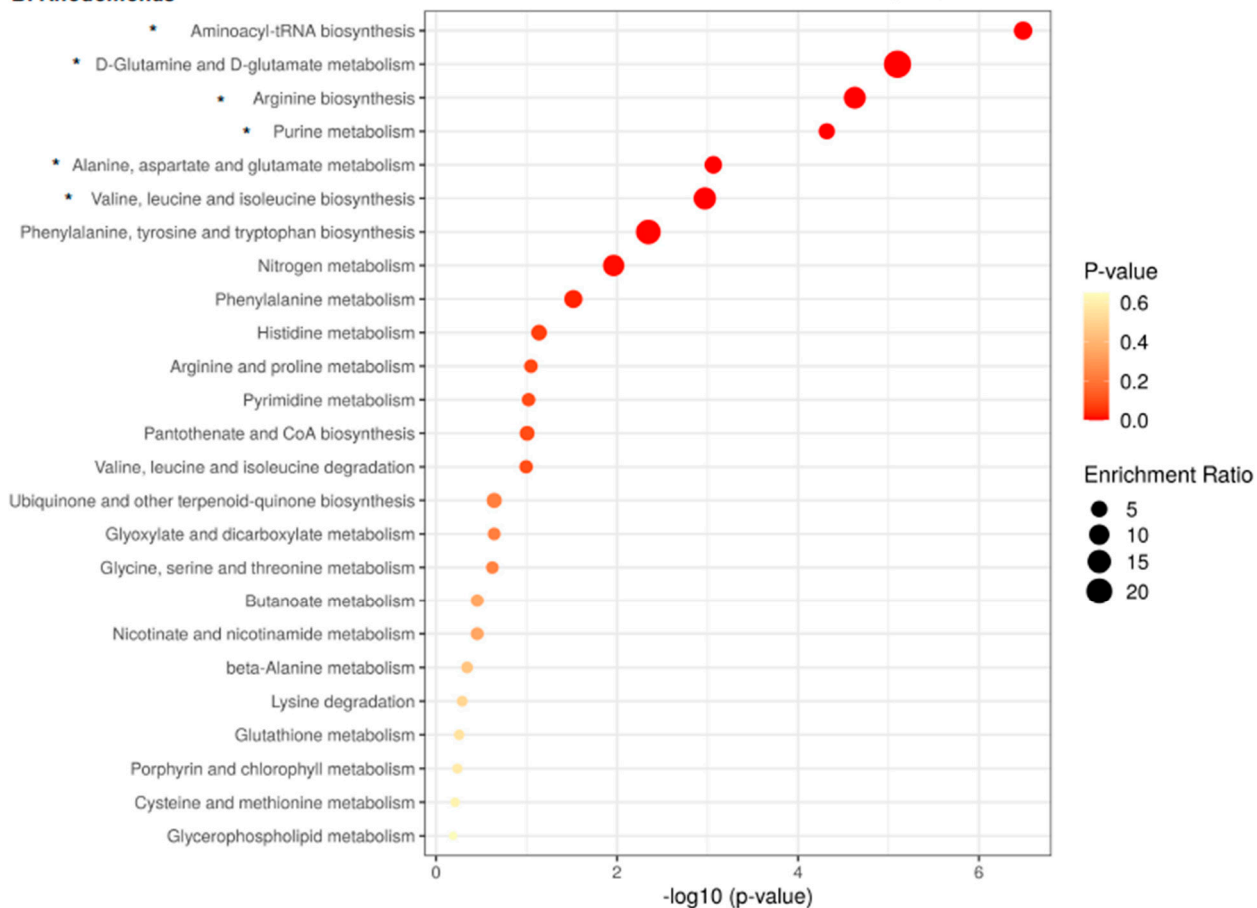

**Supplementary Figure S2.** Metabolite sets' enrichment analysis on metabolites increased (>1.5-fold comparing the treatment and the control) in cell pellets of *Karlodinium veneficum* (A) and *Rhodomonas* sp. (B).
