# Supplementary material for: Metabolomic Insights of the Effects of Bacterial Algicide IRI-160AA on Dinoflagellate Karlodinium veneficum
Source: Metabolites. 2022 Apr 1;12(4):317. doi: 10.3390/metabo12040317 (PMC9030264; doi:10.3390/metabo12040317)
Supplement: Supplementary file 1 [file metabolites-12-00317-s001.zip › Table S1.xlsx]

## Sheet: Sheet1
Table S1: Log10(RC+1) transformed relative concentrations (RC) of compounds detected in the cell pellets and filtrate of Karlodinium veneficum and Rhodomonas
kv=Karlodinium veneficum
rho= Rhodomonas
con= control
alg= algicide (treatment with algicide)
	Pellets				Filtrate
NAME	kv.con	kv.alg	rho.con	rho.alg	kv.con	kv.alg	rho.con	rho.alg
Creatine	0	0	0	0.419344	0	0	6.87777	0
Methionine	0	2.67375	0	0.814382	0	7.82469	6.71395	0
Leucine	0	2.41168	0	1.59343	0	7.66281	6.64393	6.85061
7-(tert-butyl)-4-imino-1,2,3,4,5,6-hexahydropyrido[3,4-d]pyridazine-1,5-dione	0	0	0	0	0	5.33086	6.61253	0
Isoleucine	0	2.29532	0	1.91018	5.76526	7.58619	6.43541	7.26203
Benzene	0	2.32002	0	1.29784	0	7.4868	6.31327	6.58665
Urocanic acid	0	0	0	0	5.90463	6.16884	6.24083	5.98683
Tyrosine	0.51628	1.88809	0	1.24236	0	7.11296	5.32933	5.81043
6-Dimethylaminopurine	0	1.36049	0	0.550866	4.53726	6.66097	5.32112	6.55609
1-(beta-D-ribofuranosyl)thymine	0	0	0	0.0281168	0	0	5.2889	0
N-Acetyl-L-aspartic acid	0.165699	0.908628	0	1.03571	5.02777	6.1093	5.26003	6.1726
1-Methyladenine	0	1.35897	0	0.740266	4.46796	6.60991	5.24133	6.38766
1-Nitrosopiperazine	0	0.514218	0	0.0986186	4.66569	5.41912	5.18218	5.6006
3-Methyladenine	0	1.43129	0	0.165798	0	7.05119	5.10128	0
(2R)-2-{[(1R,2S,3R,4R,5R)-4-Acetamido-2-hydroxy-6,8-dioxabicyclo[3.2.1]oct-3-yl]oxy}propanoic acid	0	1.27944	0	0.0272406	4.71932	6.9293	4.93417	3.79249
Formylkynurenine.ave	0	0.341329	0	0.0430476	0	5.75501	3.90051	5.62693
Valine	0	2.1654	0	0.919421	0	6.18674	0	0
Uridine	0	0.967276	0	0.353218	0	0	0	0
Ureidosuccinic acid	0.0783655	0	0	0.0775168	0	0	0	3.95338
Uracil	0	2.15151	0	0	0	7.26087	0	0
Tryptophan	0	0	0	0	0	6.64842	0	0
Thymine	0	1.36494	0	0	0	6.82715	0	0
Pyridoxamine	0	0	0	0	0	6.93775	0	0
Pyridoxal	0	0.969346	0	0	0	5.79704	0	0
Prolylglycine	0	0	0	0.112371	0	0	0	0
porphobilinogen	0	0	0	0.144009	0	5.56555	0	5.45181
Phenylalanine	0	2.26172	0	1.36603	0	7.5827	0	6.64678
Nicotinic acid	0	2.29217	0	0	0	0	0	0
N6-Acetyl-L-lysine	0	1.56942	0	0.664201	0	6.30409	0	0
N5-METHYLGLUTAMINE	0	2.74881	0	1.38221	0	7.32981	0	0
N-Benzylformamide	0	0	0	0.779205	0	6.55573	0	0
N-Acetylornithine	1.27839	2.19433	0	0.25588	0	6.61248	0	0
N-Acetylmuramic acid	0	0	0	0.0943161	0	0	0	0
N-a-Acetyl-L-arginine	0	1.33628	0	1.31795	0	6.25399	0	5.66621
Levulinic acid	2.68066	2.61493	0	0	0	0	0	0
L-γ-Glutamyl-L-alanine	0.368288	1.1189	0	0.431144	0	4.89145	0	0
L-5-Hydroxytryptophan	0	0	0	0	0	5.62553	0	0
Inosine	0	0.950744	0	0.328822	0	0	0	0
Imidazolelactic acid	0.403005	1.07099	0	1.05193	0	6.60512	0	6.33583
Hypoxanthine	0	0	0	0.383141	0	5.44427	0	0
Hydroxy(4-hydroxyphenyl)acetonitrile	0	0.981837	0	0	0	5.64087	0	0
Ethylmalonic acid	0	0.647809	0	0.132895	0	0	0	0
Edaravone	0	0	0	0	0	5.1407	0	4.92766
Ecgonine	0	0	0	0	0	5.28793	0	5.07871
Dihydrothymine	2.90369	2.7097	0	0	0	0	0	0
Cytosine	0	0	0	0	0	5.96108	0	0
Cytidine	1.29248	1.87388	0	0.619993	0	6.04177	0	0
CMP	0	0	0	0	0	4.68234	0	0
benzenediol	0	0	0	0	0	6.67415	0	0
Aspartic acid	0	0	0	0.99577	0	0	0	0
Arginine	0	0	0	0	0	6.53802	0	0
Adenine	0	0	0	0	0	6.85899	0	0
Acetylmuramic acid	0	0	0	0.0296496	0	0	0	0
6-Quinolinecarboxylic acid	0	0.90139	0	0.210053	0	6.27758	0	6.19083
6-Methylbenzoxazole	0	0.811554	0	0	0	5.50795	0	0
6-Methyl[1,2,4]triazolo[4,3-b]pyridazin-8-ol	0	0	0	0.538568	0	5.84601	0	5.47337
5-morpholino-2,4(1H,3H)-pyrimidinedione	0	0.530135	0	0.228047	0	5.60558	0	5.48906
4,6-dimethyl-2-(methylamino)-5-nitronicotinonitrile	0	0	0	0.0401952	0	0	0	0
4-Ethynylaniline	0	0	0	0	0	5.90284	0	5.1655
3-Hydroxy-2,5-dimethylisonicotinaldehyde	2.01198	0	0	0	0	6.95253	0	0
3-Hydroxy-2,3-dihydropyrrolo[2,1-b]quinazolin-9(1H)-one	0	0	0	0	0	5.17228	0	0
3-(3-methylbut-2-en-1-yl)-3H-purin-6-amine	0	0	0	0	0	5.86062	0	5.72611
2'-Deoxyguanosine	0	0.780145	0	0.0644345	0	0	0	0
2,5-dimethyl-4-ethyloxazole	0	0	0	0	0	5.16619	0	0
2-METHYL-L-METHIONINE	0	0	0	0	0	5.30862	0	5.33635
2-Amino-4-methylpyrimidine	0	0	0	0.162014	0	0	0	0
1,5-Diaminonaphthalene	0	0.66444	0	0	0	5.81996	0	4.992
1-Methyl-3,6-(1H,2H)-pyridazinedione	0	0	0	0	0	6.33802	0	0
L-2-Aminoadipic acid	0.124456	1.49673	0.0250812	0.284984	4.46133	5.82754	4.48286	4.41591
4-[4-(1-phenyl-1H-1,2,4-triazol-5-yl)-1,3-thiazol-2-yl]pyridine	0	1.17605	0.0273043	0.440195	0	0	0	0
1-Ethyl-3-(3-dimethylaminopropyl)carbodiimide	0.194759	0.497733	0.0719039	0.435507	4.36054	4.39241	4.38966	5.3234
Ornithine	0.315337	0.502031	0.074709	0.0795705	4.83245	4.85166	4.83847	4.83292
Guanine	1.80502	2.54392	0.0794835	1.04376	0	5.68378	0	0
1-Methylguanine	0	1.0636	0.0796205	0.439203	4.51412	6.75038	4.85336	0
Taurine	0.888975	0.847226	0.0837931	0.0216007	0	0	0	0
pterin	0.38697	1.31521	0.086173	0.607372	0	5.92088	0	0
Symmetric dimethylarginine	0.0718685	0.340277	0.09802	0.144359	0	5.60246	4.41666	4.08254
5'-S-Methyl-5'-thioadenosine	0.404113	0.636133	0.102036	0.116913	4.54972	5.28958	4.69529	4.84608
Guanosine	0	1.70763	0.102891	0.9056	0	0	0	0
Fumaric acid	0	0	0.105051	0	4.64876	0	4.71818	0
4-methyl-5-(2-phosphonooxyethyl)thiazole	0.413943	0.641718	0.108304	0.109528	4.82318	4.82203	4.80023	4.84711
Serine	0.420695	0.650182	0.110742	0.111989	4.87116	4.8375	4.81208	4.85804
Riboflavin	0	0.661275	0.120635	0.132026	0	0	0	0
Pantothenic acid	0	0	0.12473	0.0371412	0	0	0	0
Vatalanib dihydrochloride	0.414055	0.640199	0.124909	0.107638	4.516	4.53241	4.49569	4.53717
Methyl indole-3-acetate	0.532074	1.31876	0.135465	0.34194	4.97445	6.41685	5.19156	5.97534
Cystine	0.533446	0.797157	0.146546	0.147639	5.05891	5.09763	5.045	5.06608
Diaminopimelic acid	0.376494	2.82578	0.149184	1.9391	0	6.65249	0	5.29717
N-Acetyl-b-D-galactosamine	0.689774	0.929339	0.152752	0.621548	5.08299	5.50576	4.57174	5.36141
3-amino-2-phenyl-2H-pyrazolo[4,3-c]pyridine-4,6-diol	0.529144	0.813646	0.159852	0.175853	0	5.66593	0	5.3258
Methionine sulfoxide	0.613813	0.841059	0.181171	0.193567	5.53285	5.51523	5.60485	5.46711
Xanthine	0	1.5831	0.182722	1.28806	0	0	0	0
7-Methylguanine	0	2.05834	0.203202	1.06813	5.34993	7.39688	5.52626	0
2'-Deoxyadenosine	0.480173	2.1024	0.208801	0.572518	0	5.28345	0	0
Salicylic acid	0.685031	0.955513	0.219735	0.24174	4.93745	5.026	5.06488	4.85309
5-Hydroxy-2-furoic acid	1.35804	1.16251	0.24525	0.595141	5.71032	5.43329	5.85993	5.7223
Glycerol-3-phosphate	0	1.38204	0.268154	0.383022	0	5.95596	0	5.80161
Serine phosphate	0.594934	0.876847	0.294902	0.334557	0	0	0	0
Phenylethanolamine	0	0	0.305504	0.38756	0	0	6.92468	6.57697
Threonine	0	1.26958	0.306683	0.390776	0	0	0	0
Cyclo(phenylalanyl-prolyl)	0.780489	1.00415	0.322488	0.30036	0	0	0	0
Citrulline	0.916522	2.04293	0.353444	1.14694	0	5.80643	0	0
3-Hydroxybenzoic acid	1.00874	1.27217	0.354147	0.348864	0	5.23877	5.4004	5.27289
4-Methyl-5-thiazoleethanol	0.971798	1.29773	0.384918	0.489962	6.66671	6.68703	6.78898	6.47833
4-Guanidinobutyric acid	0.384094	0.927975	0.391806	0.975138	4.71069	0	5.0802	4.57986
D-Ribose	0.819105	1.20027	0.466627	0.51676	0	5.28148	0	0
2,2,6,6-Tetramethyl-4-piperidinol	1.46249	1.68818	0.538263	0.618273	6.25145	6.13186	6.01575	5.88461
Toxopyrimidine	0	0	0.560368	0.584076	5.80101	5.88102	6.87523	6.46448
Pyrimidine	1.43265	1.7972	0.724222	0.880803	7.09989	7.13082	7.22684	6.91574
5-aminolevulinic acid	1.25906	1.58996	0.799181	0.76417	6.90657	0	0	0
N(3)-(4-Methoxyfumaroyl)-2,3-diaminopropionic acid	1.60298	1.83864	0.817341	0.720763	7.16476	7.03745	5.82636	7.00148
Pipecolinic acid	1.63825	2.15129	0.910326	1.53932	0	0	6.19034	0
Asparagine	0	0.218352	0.963499	1.20792	0	0	0	0
Nicotinamide	1.56126	1.87423	0.980425	0.824297	0	6.41688	6.62467	0
4-cyclopropyl-6-methoxy-1,3,5-triazin-2-amine	1.56065	1.93574	1.02023	0.943187	7.0375	7.03319	7.49481	7.07119
Ectoine	4.05551	4.66701	1.04492	1.89303	7.41066	7.3161	0	0
D-Alanyl-D-alanine	4.062	4.67444	1.10933	2.01426	7.41623	7.58323	0	0
Thiamine	1.86538	2.20777	1.15853	1.28167	7.42355	7.45658	7.51661	7.27836
Pyroglutamic acid	1.95093	2.15997	1.26038	1.31227	6.75513	0	7.40452	6.74101
Glutamic acid	1.70684	2.53106	1.32438	1.95741	0	0	0	0
3-Methylbutanoic acid	2.11757	2.27813	1.41978	1.37546	6.30886	6.32169	6.2411	6.32367
1-pyrroline	0	1.22559	1.42692	1.24114	0	0	0	0
Pimelic acid	2.33299	2.70714	1.47422	1.42438	6.77079	6.48446	6.60523	6.7046
Adenosine	1.60449	3.29546	1.55585	2.5449	0	6.14317	6.58025	6.38111
Bis(methylbenzylidene)sorbitol	2.15622	2.43976	1.6303	1.38217	6.23512	6.2511	5.64931	6.25603
Acetylcarnitine	0	0	1.64351	1.67171	0	0	0	0
Cyclohexylamine	2.466	2.77754	1.66179	1.71265	6.77568	6.75954	6.71932	6.77527
Trigonelline	2.99796	3.15426	1.83259	1.93013	0	0	0	0
Glutamine	2.36246	2.93099	1.87617	2.06496	0	0	0	0
Uric acid	0	0	1.91725	2.89599	0	0	0	0
Choline	1.30878	2.08021	1.93505	2.12214	0	0	0	0
DL-Glyceric acid	2.64583	2.91906	1.99407	1.95054	7.03859	6.97917	7.19888	7.23562
Carnitine	0.506462	0.920269	2.18186	2.32108	0	0	6.46076	6.01357
Methyl picolinate	0	0	2.37409	2.18511	0	0	0	0
N-Methyl-D-aspartic acid	3.09108	3.70844	2.48285	2.48662	0	0	0	0
Ethylenediaminetetraacetic acid	3.0099	3.55452	2.50772	2.52139	8.37968	8.28742	4.77904	8.15987
Tetraglyme	3.25425	3.4034	2.51981	2.52071	7.34987	7.43913	7.29461	7.45779
Proline	1.66092	2.61038	2.66208	2.43119	6.55409	7.05595	6.65836	6.64891
Betaine	4.21009	4.69062	4.09224	4.22508	0	0	0	7.61887

## Sheet: Sheet2
kv=Karlodinium veneficum
rho= Rhodomonas
con= control
alg= algicide (treatment with algicide)
